# Supplementary material for: Gene expression and mutation-guided synthetic lethality eradicates proliferating and quiescent leukemia cells
Source: JCI journal article supplement (doi:10.1172/jci90825), 2017-05-07
Supplement: sd1 [file 1]

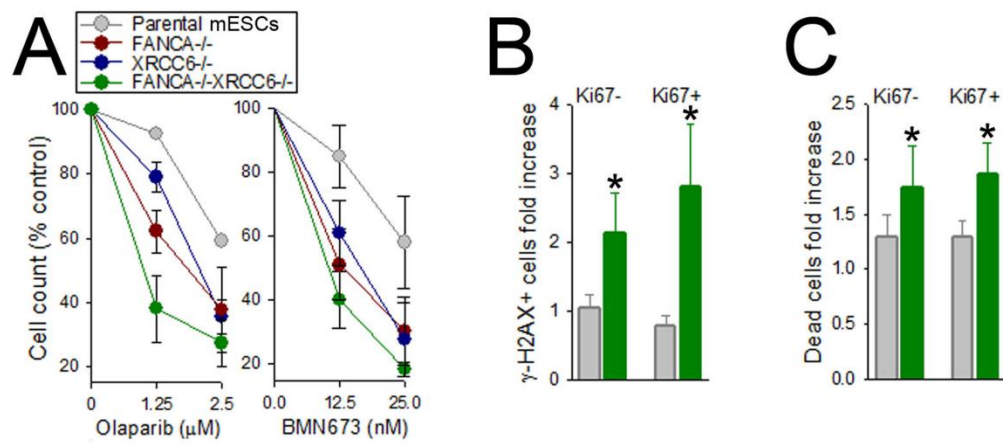

**Supplementary Fig. 1.** PARPi elevated DSBs and triggered synthetic lethality in *FANCA*<sup>-/-</sup> and/or *XRCC6*<sup>-/-</sup> proliferating cells and in *XRCC6*<sup>-/-</sup> quiescent cells. **(A)** Sensitivity of the indicated cells to olaparib and BMN673. **(B, C)** Parental (grey bars) and *FANCA*<sup>-/-</sup>*XRCC6*<sup>-/-</sup> (green bars) mESCs treated with 12.5 nM BMN673 for 72 hours; **(B)**  $\gamma$ -H2AX<sup>+</sup> Ki67<sup>-</sup> and Ki67<sup>+</sup> cells; **(C)** Dead Ki67<sup>-</sup> and Ki67<sup>+</sup> cells. Results represent mean  $\pm$  SD from 3 experiments; \* $p < 0.05$  in comparison to parental counterparts using Student t test.

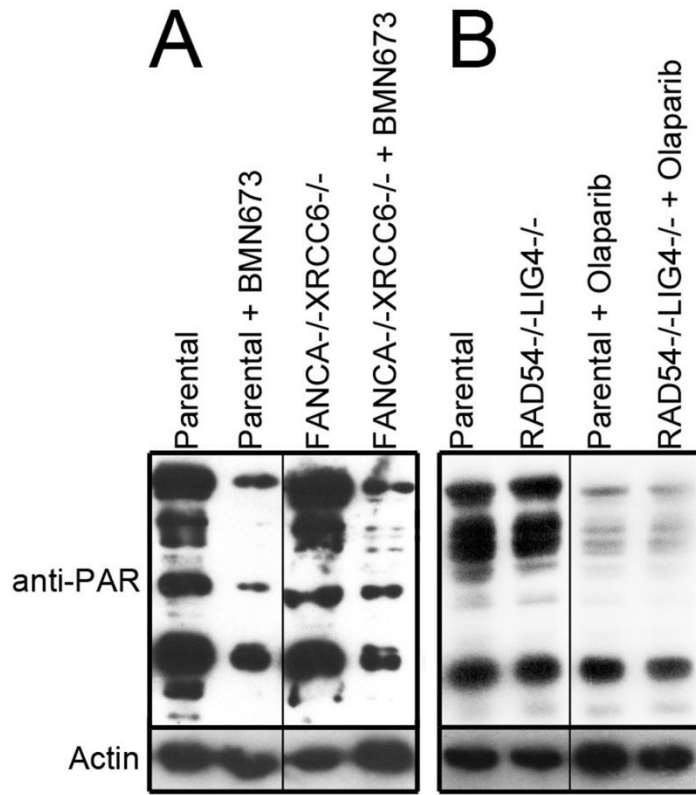

**Supplementary Fig. 2.** PARP1i downregulated PARylated proteins. (A) Parental and *FANCA*<sup>-/-</sup>*XRCC6*<sup>-/-</sup> mESCs, and (B) parental and *RAD54*<sup>-/-</sup>*LIG4*<sup>-/-</sup> Nalm-6 cells were treated or not with 0.3  $\mu$ M olaparib or 3 nM BMN673 for 24 hours. Total cell lysates were analyzed by Western blot for PARylated proteins; actin served as loading control.

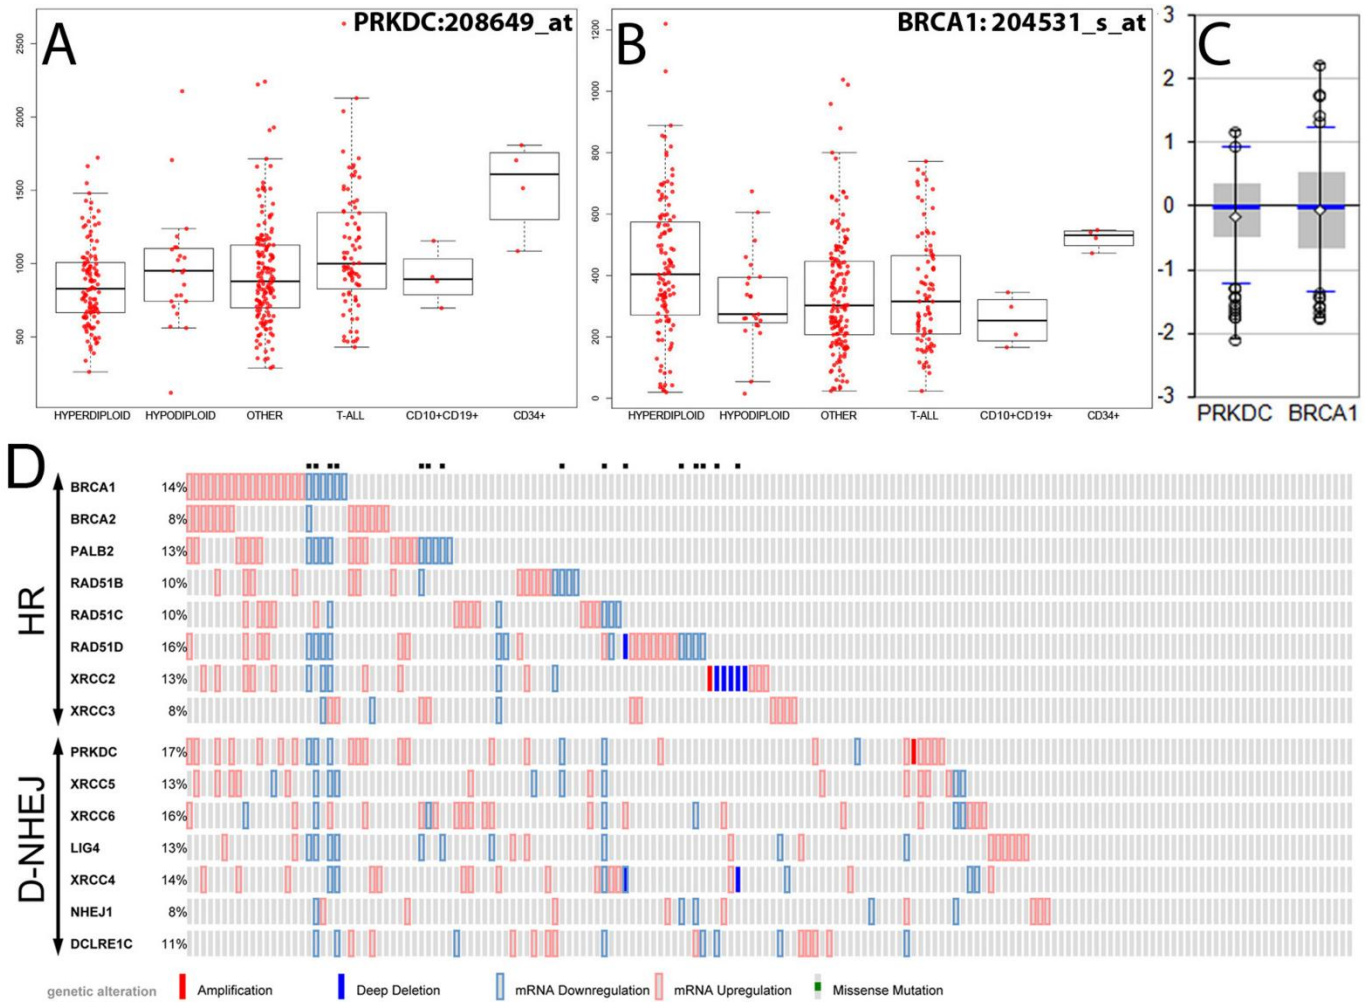

**Supplementary Fig. 3.** Wide-range expression levels of PRKDC and BRCA1 in ALLs and AMLs generate BRCA/DNA-PK deficient individual leukemias. Microarray analysis of the expression of PRKDC (**A**) and BRCA1 (**B**) in various types of B-ALL (from left to right): hyperdiploid, hypodiploid, other, in T-ALL, and in normal CD10<sup>+</sup>CD19<sup>+</sup> cells and CD34<sup>+</sup> cells [Pediatric Cancer Genome Project (St. Jude Children’s Research Hospital and Washington University; <http://explore.pediatriccancergenomeproject.org>)]. Each red dot represents expression level of PRKDC and BRCA1 from individual patient. (**C**) Microarray analysis of PRKDC and BRCA1 expression in AMLs characterized by Figueroa and colleagues (*1*). (**D**) Analysis of TCGA database revealed individual AMLs displaying biomarkers of BRCA/DNA-PK deficiency. The indicated genes encoding proteins in HR and D-NHEJ pathways were included in to the analysis. Samples displaying putative BRCA/DNA-PK deficiency (deep deletion and Z-score threshold  $\leq -1.5$ ) are marked by dots.

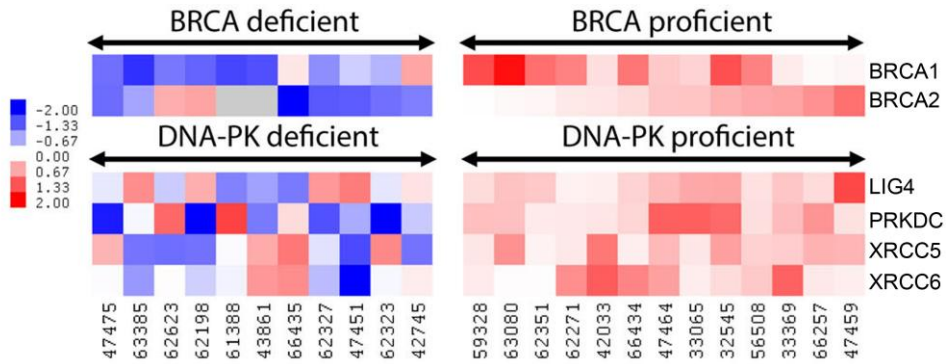

**Supplementary Fig. 4. Microarray expression pattern analysis of the genes of BRCA and DNA-PK pathways in AML patients predicting BRCA/DNA-PK deficiency/proficiency.** We identified 13 BRCA/DNA-PK deficient patients in microarrays from 436 AML patients (NCBI accession # GSE16432) using limited number BRCA and DNA-PK pathway genes with available data [clinical trials AMLSG HD98A and AMLSG HD98B (2)].

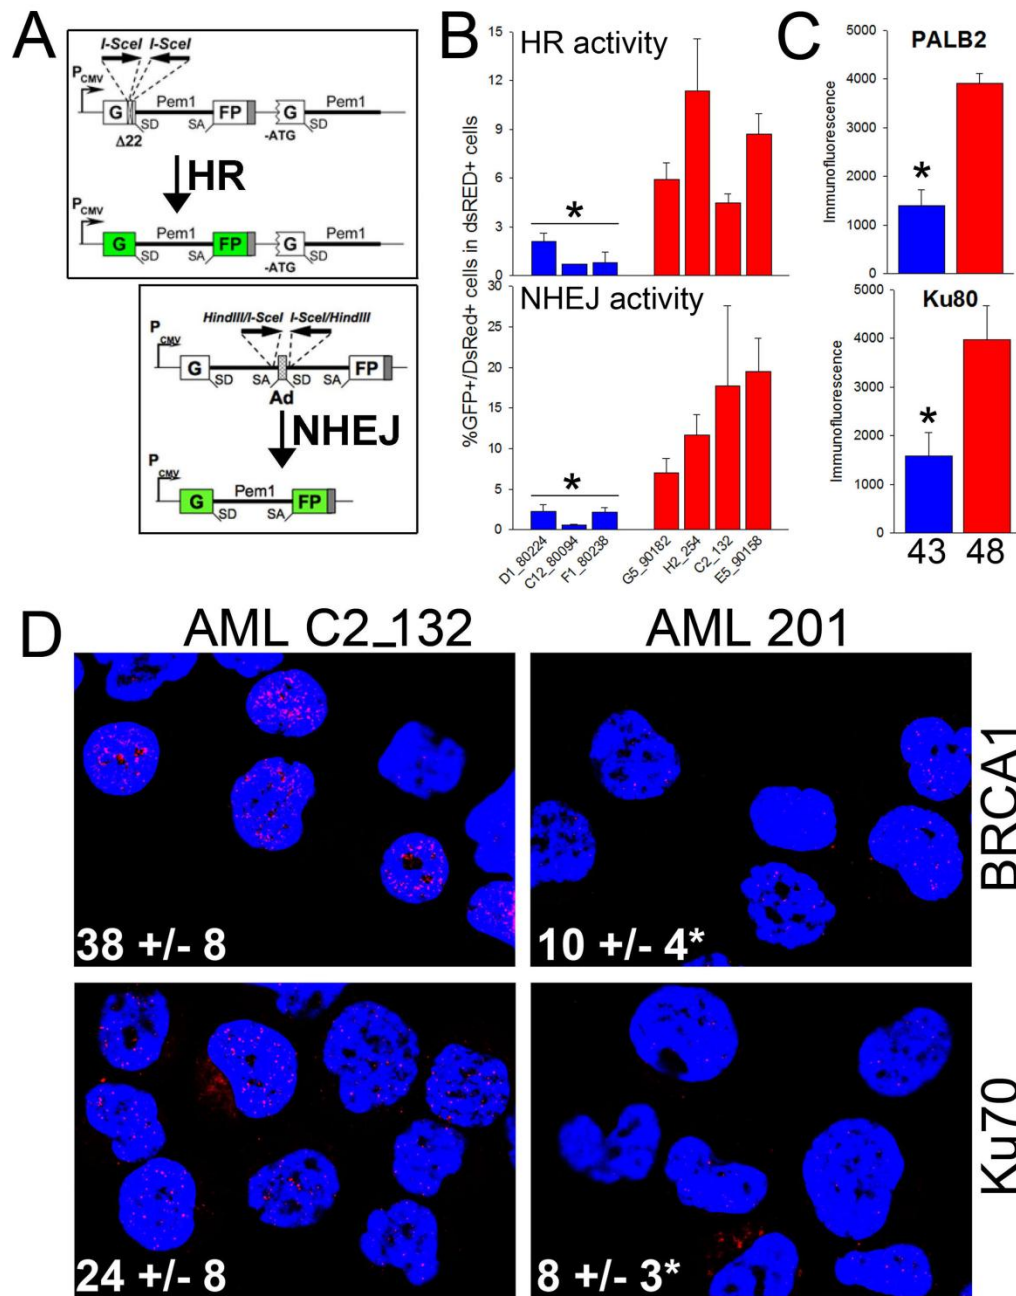

**Supplementary Fig. 5. Functional assays of HR and NHEJ in BRCA/DNA-PK deficient and proficient cells.** (A) HR and NHEJ reporter cassettes and repair products. (B) HR and NHEJ activities in BRCA/DNA-PK deficient (blue) and proficient (red) primary AML samples were detected as describe before with modifications (3-5). Two- to five million AML cells were nucleofected with 5  $\mu$ g of I-SceI – linearized HR or NHEJ reporter plasmid and 2.5  $\mu$ g of pDsRed plasmid using Nucleofector (Lonza; program U-008, Human CD34 Cell Nucleofector® Kit). HR or NHEJ event restores functional GFP expression. After 72 hours the percentage of GFP+/DsRed+ cells in DsRed+ cells was analyzed by flow cytometry to assess HR and NHEJ activity. Results represent mean  $\pm$  SD from triplicates/sample; \* $p$ <0.001 in comparison to all BRCA/DNA-PK-positive samples. (C) Flow cytometry analysis of DSB repair proteins in individual ALLs (#43 and #48) predicted to be BRCA/DNA-PK deficient (blue) or proficient (red). Results represent mean  $\pm$  SD from 3 measurements/sample. (D) Representative nuclear staining (DAPI) for BRCA1 and Ku70 foci in BRCA/DNA-PK deficient AML 201 and BRCA/DNA-PK proficient AML C2-132 cell samples. Foci were detected as described before (3, 6). Results represent mean  $\pm$  SD number of foci/nucleus in 10 cells displaying  $\geq$ 5 foci/cell per experimental group. \* $p$ ≤0.001 using Student t test.

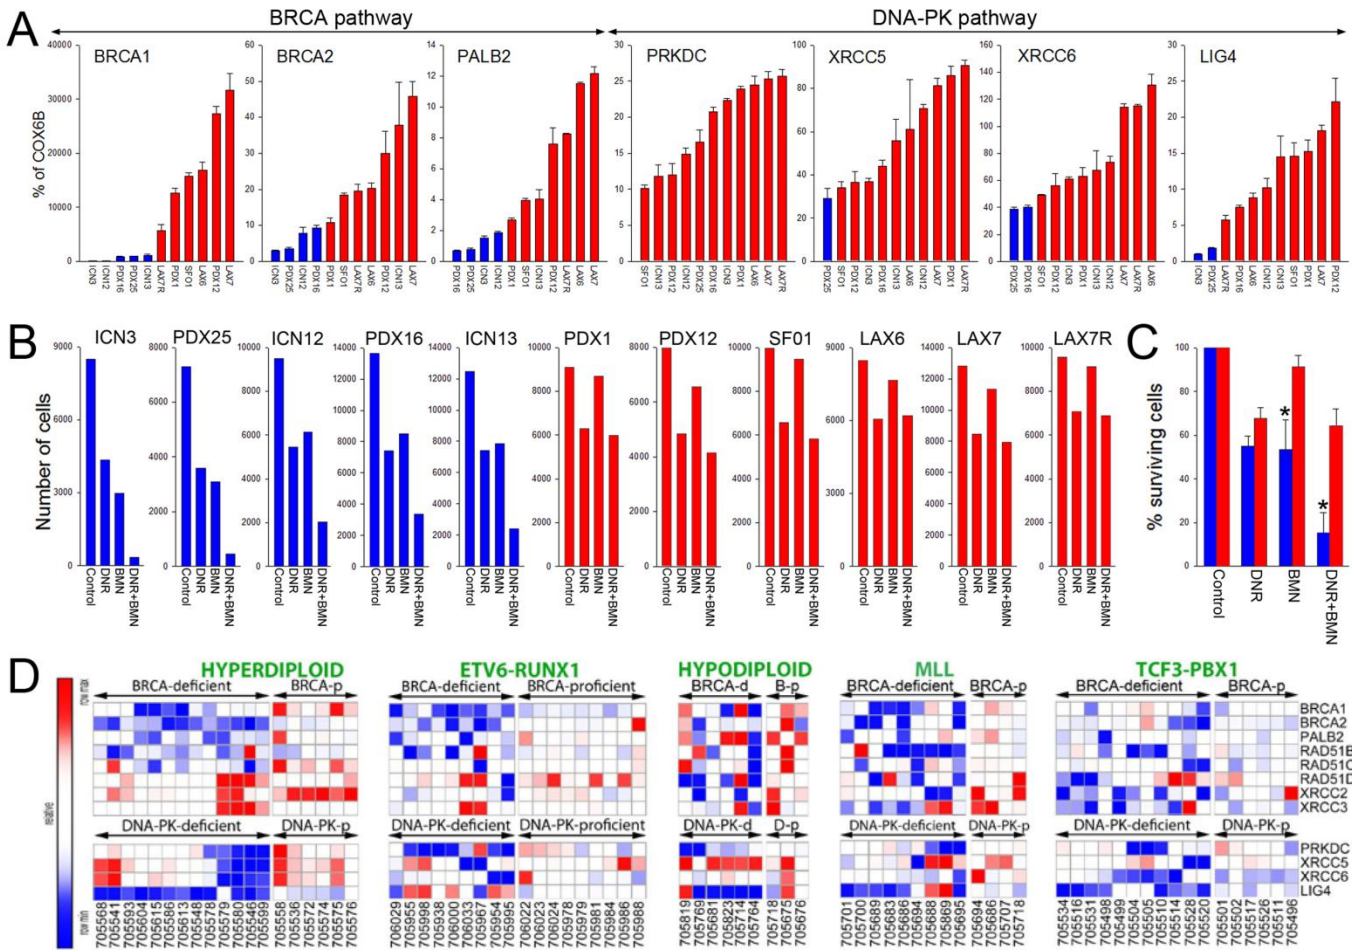

**Supplementary Fig. 6.** RT-qPCR and mRNA microarray expression pattern analyses of the genes of BRCA and DNA-PK pathways in Philadelphia chromosome-negative B-ALLs from individual patients predict BRCA/DNA-PK deficiency/proficiency. **(A)** Primary cells from 11 individual B-ALL samples were tested simultaneously by RT-qPCR for expression levels of genes in BRCA and DNA-PK pathways, which were then normalized against a housekeeping gene such as COX6B. The most dramatic differences between individual samples were observed in expressions of BRCA1, PALB2 and BRCA2 from the BRCA pathway (546, 17, and 15 -fold difference between the highest and lowest levels, respectively), and also of LIG4 from the DNA-PK pathway (20-fold) whereas PRKDC, XRCC5 and XRCC6 demonstrated only 2-3 -fold difference. Samples, in which low expression of BRCA/DNA-PK genes was associated with BMN673 sensitivity or resistance (see panel **B**), are marked in blue and red, respectively. **(B)** Sensitivity to 1  $\mu\text{g/ml}$  DNR, 25 nM BMN673, or DNR + BMN673 of the primary ALL xenograft cells from BRCA and/or DNA-PK deficient (blue bars) and BRCA and/or DNA-PK proficient (red bars) samples. **(C)** Cumulative percentages of cells from samples examined in panel **B**;  $p < 0.001$  in comparison to corresponding BRCA/DNA-PK proficient samples using Student t test. **(D)** Microarray analyses of gene expression patterns in 308 Philadelphia chromosome-negative B-ALL samples [NCBI accession # GSE33315 (7)] predicted BRCA and DNA-PK deficient phenotype in 13 of 116 hyperdiploid, 9 of 99 ETV6-RUNX1, 6 of 23 hypodiploid, 9 of 30 MLL-rearranged, and 11 of 40 TCF3-PBX1 patient samples. B-p and BRCA-p = BRCA proficient; D-p and DNA-PK-p = DNA-PK proficient.



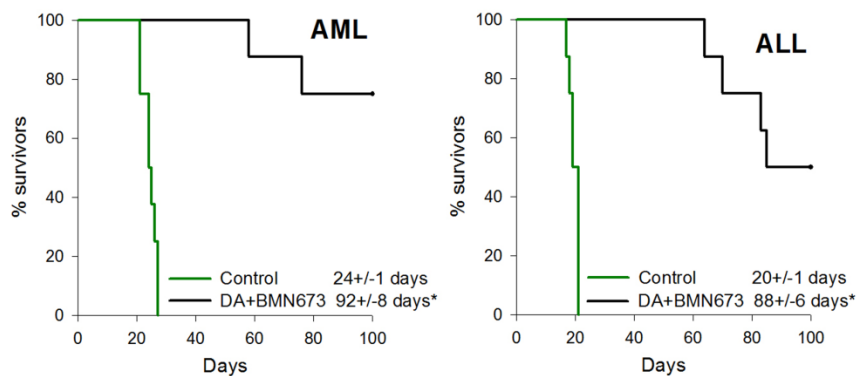

**Supplementary Fig. 7.** DA+BMN673 eliminated LSCs from BRCA/DNA-PK deficient AML and ALL PLXs in vivo. Sub-lethally irradiated NSG mice were injected intravenously with  $2 \times 10^6$  bone marrow cells harvested from NSG mice carrying BRCA/DNA-PK deficient AML and ALL PLXs, which were untreated or treated with DA+BMN673 (see Figure 7). Survival curves and MST  $\pm$  SE (8 mice/group); \* $p < 0.001$  using Kaplan-Meier LogRank test.

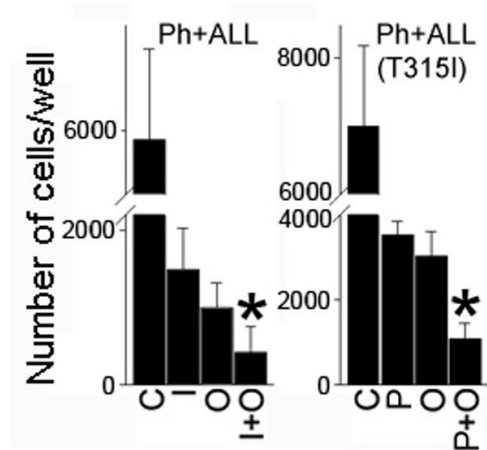

**Supplementary Fig. 8.** PARP1i olaparib combined with TKI exerted synergistic anti-Ph+ALL effect. Leukemia cells from patients with not mutated BCR-ABL1 kinase [Ph+ALL; n=3] and these from patients at relapse with T315I mutation [Ph+ALL(T315I); n=3] were untreated (C) or treated with 1  $\mu$ M imatinib (IM), 12.5nM ponatinib (P), 2.5  $\mu$ M olaparib (O) and a combination of IM + O or P + O. Living cells were counter after 5 days using Trypan blue; \*p<0.02 in comparison to cells treated with individual drugs using two-way ANOVA.



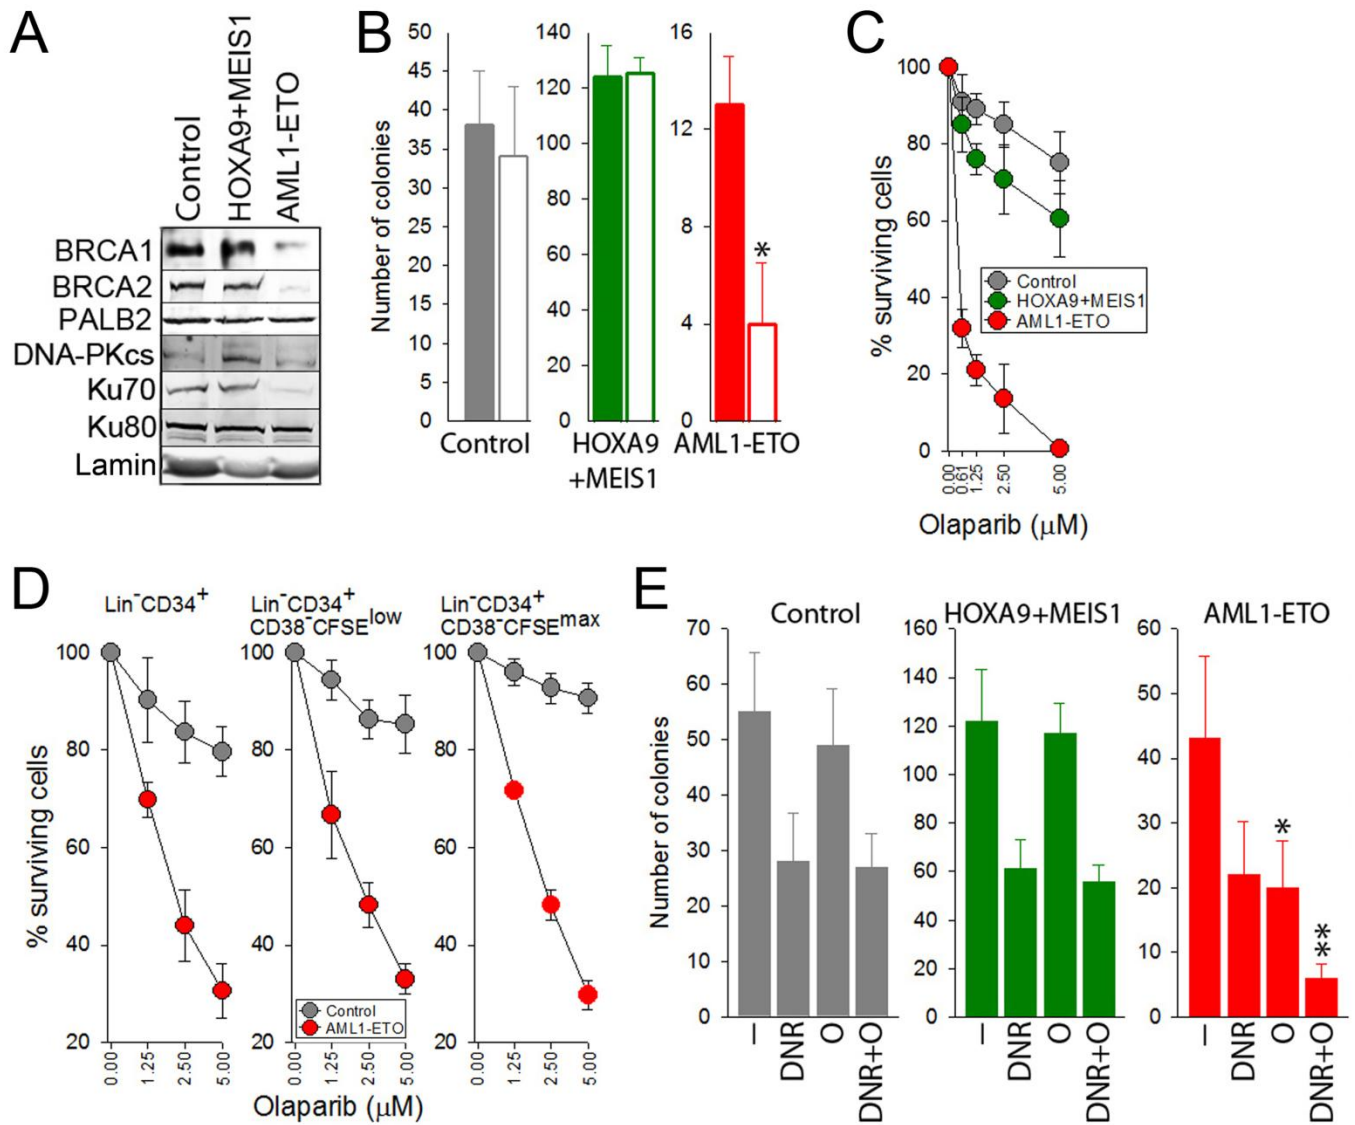

**Supplementary Fig. 9.** Leukemia expressing AML1-ETO display BRCA/DNA-PK deficiency and are sensitive to PARP1i-mediated dual cellular synthetic lethality. (A-C) Non-transformed GFP+ mBMCs (Control) and those expressing AML1-ETO, and HOXA9 + MEIS1 were examined. (A) Western analysis; (B) Colonies from *Parp1*<sup>+/+</sup> (solid bars) and *Parp1*<sup>-/-</sup> (transparent bars) mBMCs (triplicate experiment); \**p*=0.03 using Student t test. (C) Cells surviving olaparib treatment (triplicate experiment). (D) Lin<sup>-</sup>CD34<sup>+</sup> LPCs/HPCs, Lin<sup>-</sup>CD34<sup>+</sup>CD38<sup>-</sup>CFSE<sup>max</sup> quiescent and Lin<sup>-</sup>CD34<sup>+</sup>CD38<sup>-</sup>CFSE<sup>low</sup> proliferating AML LSCs expressing AML1-ETO (n=3) and HSCs from healthy donors (Control, n=3) surviving olaparib treatment. (E) Colonies from GFP+ mBMCs (Control) and these expressing HOXA9 + MEIS1 or AML1-ETO, untreated (-) and treated with 1 μg/ml DNR, 0.6125 μM olaparib (O), or DNR+O (triplicate experiment); \**p*<0.02 in comparison to control using Student t test; \*\**p*≤0.006 in comparison to DNR and O using Student t test adjusted to multiple comparisons.

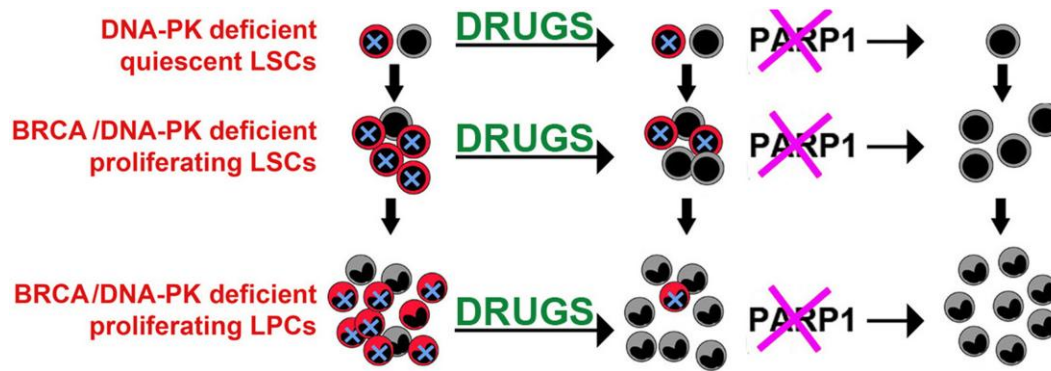

**Supplementary Fig. 10.** Proposed model of dual cellular synthetic lethality triggered by PARP1i. Leukemia cells (red), in contrast to normal counterparts (grey), accumulate numerous spontaneous and drug-induced DSBs (light blue cross). Currently approved drugs eliminate a bulk of proliferating LSCs/LPCs, but cannot eradicate drug-refractory quiescent LSCs and drug-resistant LSCs/LPCs. These cells could be eradicated by PARP1i causing dual cellular synthetic lethality in DNA-PK –deficient quiescent LSCs and BRCA/DNA-PK –deficient proliferating LSCs/LPCs, whereas normal cells will be spared.

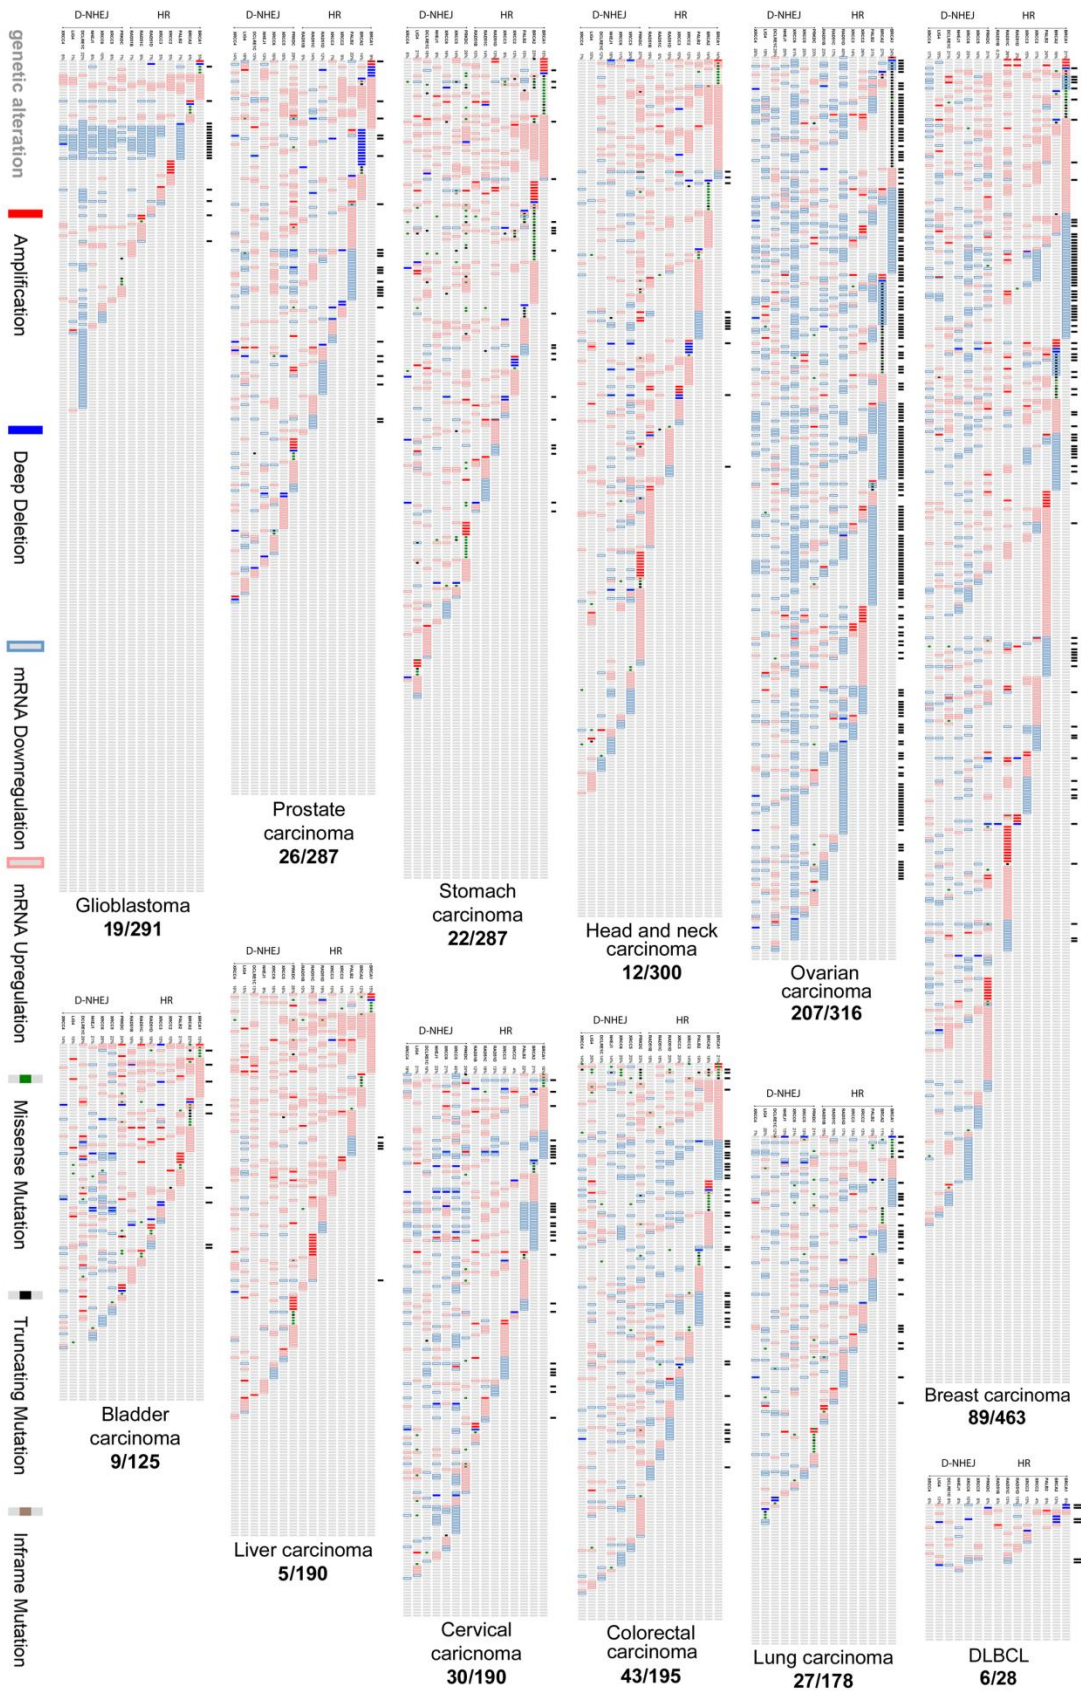

**Supplementary Fig. 11. BRCA/DNA-PK deficiency detected in various tumor types from individual patients in TCGA database.** Numbers of BRCA/DNA-PK deficient samples/total numbers of samples are shown. Samples displaying biomarkers of BRCA/DNA-PK deficiency are marked by dots.

**Supplementary Table 1.** Clinical annotation for CML cases.

| <b>Diagnosis</b> | <b>ID</b> | <b>Molecular lesion</b> | <b>Karyotype</b>       |
|------------------|-----------|-------------------------|------------------------|
| CML-CP           | 142       | <i>BCR-ABL1</i>         | 46,XY,t(9;22)(q34;q11) |
| CML-CP           | 143       | <i>BCR-ABL1</i>         | 46,XY,t(9;22)(q34;q11) |
| CML-CP           | 145       | <i>BCR-ABL1</i>         | 46,XY,t(9;22)(q34;q11) |
| CML-CP           | 146       | <i>BCR-ABL1</i>         | 46,XY,t(9;22)(q34;q11) |
| CML-CP           | 155       | <i>BCR-ABL1</i>         | Not available          |
| CML-CP           | 158       | <i>BCR-ABL1</i>         | Not available          |
| CML-CP           | 170       | <i>BCR-ABL1</i>         | 46,XX,t(9;22)(q34;q11) |
| CML-CP           | 171       | <i>BCR-ABL1</i>         | 46,XY,t(9;22)(q34;q11) |
| CML-CP           | 178       | <i>BCR-ABL1</i>         | Not available          |
| CML-CP           | 179       | <i>BCR-ABL1</i>         | Not available          |
| CML-AP           | 51        | <i>BCR-ABL1</i>         | Not available          |
| CML-AP           | 52        | <i>BCR-ABL1</i>         | Not available          |
| CML-AP           | 60        | <i>BCR-ABL1</i>         | Not available          |

**Supplementary Table 2.** Clinical annotation for AML cases.

| Diagnosis | ID     | Molecular lesion          | Karyotype                              | Flow cytometry                                                                                                        |
|-----------|--------|---------------------------|----------------------------------------|-----------------------------------------------------------------------------------------------------------------------|
| AML       | 201    | <i>Not available</i>      | Del12(q13-q15)                         | CD13, CD33, CD34, CD117                                                                                               |
| AML       | 687    | <i>AML1-ETO</i>           | 46,XY,t(8;21)(q22;q22)                 | CD10-, CD13 dim +, CD14-, CD15 large subset +, CD19 dim +, CD20-, CD33+, CD34+, CD64-, CD79 dim +, HLA-DR+, TdT dim + |
| AML       | 1587   | <i>AML1-ETO</i>           | 46,XY,t(8;21)(q22;q22),del(13)(q12q22) | CD10-, CD13+, CD14-, CD15 var +, CD19 dim +, CD20-, CD33+, CD34 dim +, CD64 dim +, CD79-, HLA-DR+, TdT-               |
| AML       | 2281   | <i>AML1-ETO</i>           | 6,XX,t(8;21)(q22;q22),del(9)(q22)      | CD10 variable +, CD13+, CD15-, CD19+, CD20 small +/-, CD33 dim variable +, CD34+, CD79+, HLA-DR+, TdT subset +        |
| AML       | 132    | <i>FLT3(wt), NPM(wt)</i>  | Not available                          | Not available                                                                                                         |
| AML       | 254    | <i>FLT3(wt), NPM(wt)</i>  | Not available                          | Not available                                                                                                         |
| AML       | 8127   | <i>Not available</i>      | Not available                          | Not available                                                                                                         |
| AML       | 9307   | <i>FLT3(TKD), NPM(na)</i> | Not available                          | Not available                                                                                                         |
| AML       | 80088  | <i>FLT3(wt), NPM(mut)</i> | Not available                          | Not available                                                                                                         |
| AML       | 80094  | <i>NPM(wt), FLT3(wt)</i>  | Not available                          | Not available                                                                                                         |
| AML       | 80224  | <i>FLT3(wt), NPM(mut)</i> | Not available                          | Not available                                                                                                         |
| AML       | 80238  | <i>FLT3(wt), NPM(mut)</i> | Not available                          | Not available                                                                                                         |
| AML       | 90158  | <i>Not available</i>      | Not available                          | Not available                                                                                                         |
| AML       | 90182  | <i>FLT3(wt), NPM(wt)</i>  | Not available                          | Not available                                                                                                         |
| AML       | 100112 | <i>FLT3(wt), NPM(wt)</i>  | Not available                          | Not available                                                                                                         |
| AML       | 747899 | <i>Not available</i>      | Not available                          | Not available                                                                                                         |

ID# 201 = PLX

**Supplementary Table 3.** Clinical annotation for ALL cases (PLXs).

| <b>Diagnosis</b> | <b>ID</b> | <b>Molecular lesion</b> | <b>Karyotype</b>                                                                                                           | <b>Flow cytometry</b>                                                 |
|------------------|-----------|-------------------------|----------------------------------------------------------------------------------------------------------------------------|-----------------------------------------------------------------------|
| B-ALL            | ICN3      | <i>MLL-AF4</i>          | Not available                                                                                                              | Not available                                                         |
| B-ALL            | ICN12     | <i>E2A-PBX1</i>         | t(1;19)(q23;p13)                                                                                                           | Not available                                                         |
| B-ALL            | ICN13     | <i>MLL-AF4</i>          | t(4;11)(q21;q23)                                                                                                           | Not available                                                         |
| B-ALL            | LAX6      | <i>IGH-TCRB</i>         | t(7;14)(q34;q32)                                                                                                           | Not available                                                         |
| B-ALL            | LAX7      | Not available           | Not available                                                                                                              | Not available                                                         |
| B-ALL            | LAX7R     | Not available           | Not available                                                                                                              | Not available                                                         |
| B-ALL            | SFO1      | Not available           | Not available                                                                                                              | Not available                                                         |
| B-ALL            | PDX1      | Not available           | Not available                                                                                                              | Not available                                                         |
| B-ALL            | PDX12     | Not available           | Not available                                                                                                              | Not available                                                         |
| B-ALL            | PDX16     | <i>MLL-AF4</i>          | 46,XY,t(4;11)(q21;q23)[1]/46,s1,t(9;14)(p?13;q?11.2)[12]/46,sd11,+X,-der(14)t(9;14)[3]/47,sd11,+X,add(9)(p2?2)[6]/46,XY[2] | Not available                                                         |
| B-ALL            | 43        | Not available           | 11q23                                                                                                                      | Not available                                                         |
| B-ALL            | 48        | Not available           | Not available                                                                                                              | Not available                                                         |
| B-ALL            | LAX9      | <i>BCR-ABL1</i>         | t(9;22)(q34;q11)                                                                                                           | Not available                                                         |
| B-ALL            | PDX2      | <i>BCR-ABL1</i>         | Not available                                                                                                              | CD10, CD19, CD22, CD34, cytoplasmic CD79a,dim CD123, HLA-DR, and TdT+ |
| B-ALL            | TXL3      | <i>BCR-ABL1</i>         | t(9;22)(q34;q11)                                                                                                           | Not available                                                         |
| B-ALL            | BLQ1      | <i>BCR-ABL1 (T315I)</i> | der(9), der(22)                                                                                                            | Not available                                                         |
| B-ALL            | BLQ5      | <i>BCR-ABL1 (T315I)</i> | der(9), der(22)                                                                                                            | Not available                                                         |
| B-ALL            | LAX2      | <i>BCR-ABL1 (T315I)</i> | t(9;22)(q34;q11)                                                                                                           | Not available                                                         |



**Supplementary Table 4.** Clinical annotation for t-MDS/AML cases.

| <b>Primary diagnosis</b>           | <b>ID</b> | <b>Karyotype at t-MDS</b>                 | <b>Morphology at t-MDS</b>                                          |
|------------------------------------|-----------|-------------------------------------------|---------------------------------------------------------------------|
| HD                                 | L5021     | del(5), del(18), +(2), +(3)               | AML w/ multilineage dysplasia                                       |
| Breast carcinoma                   | L5034     | del5q, +8, +11                            | AML                                                                 |
| Bladder carcinoma                  | L5030     | normal                                    | AML 40-50% blasts, hypercellular marrow (90%)                       |
| MM                                 | L5047     | monosomy 2, 11q13                         | MDS, hypercellular (40%), dysplastic megakaryocytes                 |
| NHL                                | L5043     | del7q                                     | AML 24% blasts, hypocellular marrow (20%)                           |
| NHL                                | L5035     | del(5q),t(1;2), t(12;15), -2, -3, -21     | MDS, RAEB2, 16.5% blasts                                            |
| Ovarian carcinoma                  | L5168     | del18q                                    | MDS, hypercellular (59%), trilineage dyspoiosis excess blasts (16%) |
| Cervical and rectal carcinoma, NHL | L5251     | monosomy 5, monosomy 7                    | AML, hypercellular (50%), 27% blasts                                |
| NHL                                | L5075     | normal                                    | MDS, RAEB2, 15% blasts                                              |
| NHL                                | L5164     | inversion 1 , +Y                          | MDS                                                                 |
| Breast carcinoma                   | L5033     | t(11;17)(q23;25), trisomy 6,8,12,18,19,20 | AML, 84% blasts                                                     |
| Breast carcinoma                   | L5250     | monosomy 7, del(5q)                       | MDS, normocellular, low-grade                                       |
| NHL                                | L5166     | del(20q)                                  | normal, thrombocytopenia, anemia                                    |
| HD/HIV                             | L5258     | del7q                                     | MDS, normocellular, low-grade                                       |
| Cervical, rectal carcinoma         | L5232     | del7q, monosomy 12                        | MDS, 6% blasts                                                      |
| NHL                                | L5069     | monosomy 7                                | normal, anemia, thrombocytopenia                                    |
| CLL                                | L5261     | monosomy 5, del7q, del4p, t(12;14)        | MDS, <5% blasts, erythroid hyperplasia, dysmegakaryopoiesis         |
| NHL                                | L5217     | del5q, del7q, del12q                      | MDS, normocellular                                                  |
| NHL                                | L5071     | monosomy 7, t(2;19), t(3;9), +20p         | MDS, mild dyserythropoiesis                                         |
| Prostate, Kidney carcinoma         | L5064     | del3, -5, del6, del 16, del 17, +22,      | MDS, multilineage dysplasia, <5% blasts                             |
| APL                                | L5144     | del 7q                                    | MDS, low-grade                                                      |
| AML                                | L5222     | t(2;3)(p23;q29)                           | MDS, myeloid left shift                                             |
| ALL                                | L5080     | t(7;20), del 20q                          | MDS, hypercellular (>95%), 3-5% blasts                              |

HD = Hodgkin disease, MM = multiple myeloma, NHL = non-Hodgkin lymphoma, CLL = chronic lymphocytic leukemia, APL = acute promyelocytic leukemia, AML = acute myeloid leukemia, ALL = acute lymphoblastic leukemia



**Supplementary Table 5.** Primer sequences for RT-qPCR analysis of B-ALLs

| <i>Gene</i>  | Sense primer (5'-3')      | Antisense primer (5'-3')       |
|--------------|---------------------------|--------------------------------|
| <i>PALB2</i> | GGGACTTACTTCTCGGTCAGTGTAC | CGACCATTTACAAAAGACCAA          |
| <i>BRCA1</i> | GGAGGTCAGGAGTTCGAAACC     | ACCGGCTAATTTCTGTATTTTGTAGTAGAG |
| <i>BRCA2</i> | ACCTGTTAGTCCCATTGTACATTTG | CACAACCTCCTTGGTGGCTGAA         |
| <i>RAD51</i> | TTCAGGCCAGTGTGGTGTCTT     | TGGGCTCAAGCGATCCA              |
| <i>PRKDC</i> | CTGATGGACCAGGCAACAGA      | TCCAGGGCTCCCATCCTT             |
| <i>XRCC5</i> | TGTGTTGAGCAAGCAGTAGCATT   | AGTCCGTCCTTACCCATGGTT          |
| <i>XRCC6</i> | TGGCCTTGATTTGATGGA        | CAGTCTTTTATTCATTGCTTCAACCT     |
| <i>LIG4</i>  | ATGGCTTCTCTGATTGCTGATTT   | CGGTGTGGCGTCGAAAC              |
| <i>COX6b</i> | AACTACAAGACCGCCCTTT       | GCAGCCAGTTCAGATCTCC            |

**Supplementary Table 6.** Primer sequences for RT-qPCR analysis of t-MDS/AML.

|                      |               |
|----------------------|---------------|
| <i>Hs00984230_m1</i> | <b>B2M</b>    |
| <i>Hs01556193_m1</i> | <b>BRCA1</b>  |
| <i>Hs00609073_m1</i> | <b>BRCA2</b>  |
| <i>Hs02758991_g1</i> | <b>GAPDH</b>  |
| <i>Hs01866071_u1</i> | <b>LIG4</b>   |
| <i>Hs00227120_m1</i> | <b>NHEJ1</b>  |
| <i>Hs00226617_m1</i> | <b>PALB2</b>  |
| <i>Hs04195439_s1</i> | <b>PRKDC</b>  |
| <i>Hs00427442_m1</i> | <b>RAD51C</b> |
| <i>Hs00979545_g1</i> | <b>RAD51D</b> |
| <i>Hs03044154_m1</i> | <b>XRCC2</b>  |
| <i>Hs00193725_m1</i> | <b>XRCC3</b>  |
| <i>Hs00897854_m1</i> | <b>XRCC5</b>  |
| <i>Hs01922655_g1</i> | <b>XRCC6</b>  |

## Supplementary references

1. Figueroa, M.E., Lugthart, S., Li, Y., Eipelinck-Verschueren, C., Deng, X., Christos, P.J., Schifano, E., Booth, J., van Putten, W., Skrabanek, L., et al. 2010. DNA methylation signatures identify biologically distinct subtypes in acute myeloid leukemia. *Cancer Cell* 17:13-27.
2. Kharas, M.G., Lengner, C.J., Al-Shahrour, F., Bullinger, L., Ball, B., Zaidi, S., Morgan, K., Tam, W., Paktinat, M., Okabe, R., et al. 2010. Musashi-2 regulates normal hematopoiesis and promotes aggressive myeloid leukemia. *Nat Med* 16:903-908.
3. Slupianek, A., Nowicki, M.O., Koptyra, M., and Skorski, T. 2006. BCR/ABL modifies the kinetics and fidelity of DNA double-strand breaks repair in hematopoietic cells. *DNA Repair (Amst)*. 5:243-250. Epub 2005 Nov 2016.
4. Seluanov, A., Mao, Z., and Gorbunova, V. 2010. Analysis of DNA double-strand break (DSB) repair in mammalian cells. *J Vis Exp* 43:1-6.
5. Mao, Z., Jiang, Y., Liu, X., Seluanov, A., and Gorbunova, V. 2009. DNA repair by homologous recombination, but not by nonhomologous end joining, is elevated in breast cancer cells. *Neoplasia* 11:683-691.
6. Podszywalow-Bartnicka, P., Wolczyk, M., Kusio-Kobialka, M., Wolanin, K., Skowronek, K., Nieborowska-Skorska, M., Dasgupta, Y., Skorski, T., and Piwocka, K. 2014. Downregulation of BRCA1 protein in BCR-ABL1 leukemia cells depends on stress-triggered TIAR-mediated suppression of translation. *Cell Cycle* 13:3727-3741.
7. Zhang, J., Ding, L., Holmfeldt, L., Wu, G., Heatley, S.L., Payne-Turner, D., Easton, J., Chen, X., Wang, J., Rusch, M., et al. 2012. The genetic basis of early T-cell precursor acute lymphoblastic leukaemia. *Nature* 481:157-163.
